# Supplementary material for: Striking Antibody Evasion Manifested by the Omicron Variant of SARS-CoV-2
Source: bioRxiv or medRxiv preprint supplement (doi:10.1101/2021.12.14.472719), 2021-12-21
Supplement: Supplementary file [file media-1.pdf]

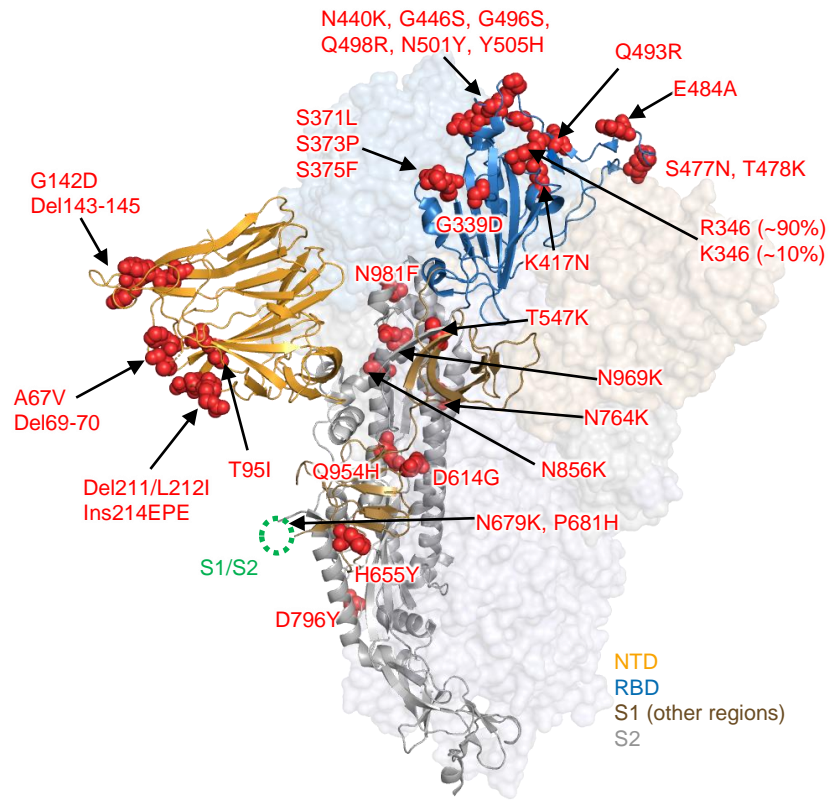

**Extended Data Fig. 1.** Mutations within B.1.1.529 denoted on the full SARS-CoV-2 spike trimer (PDB: 6zge).

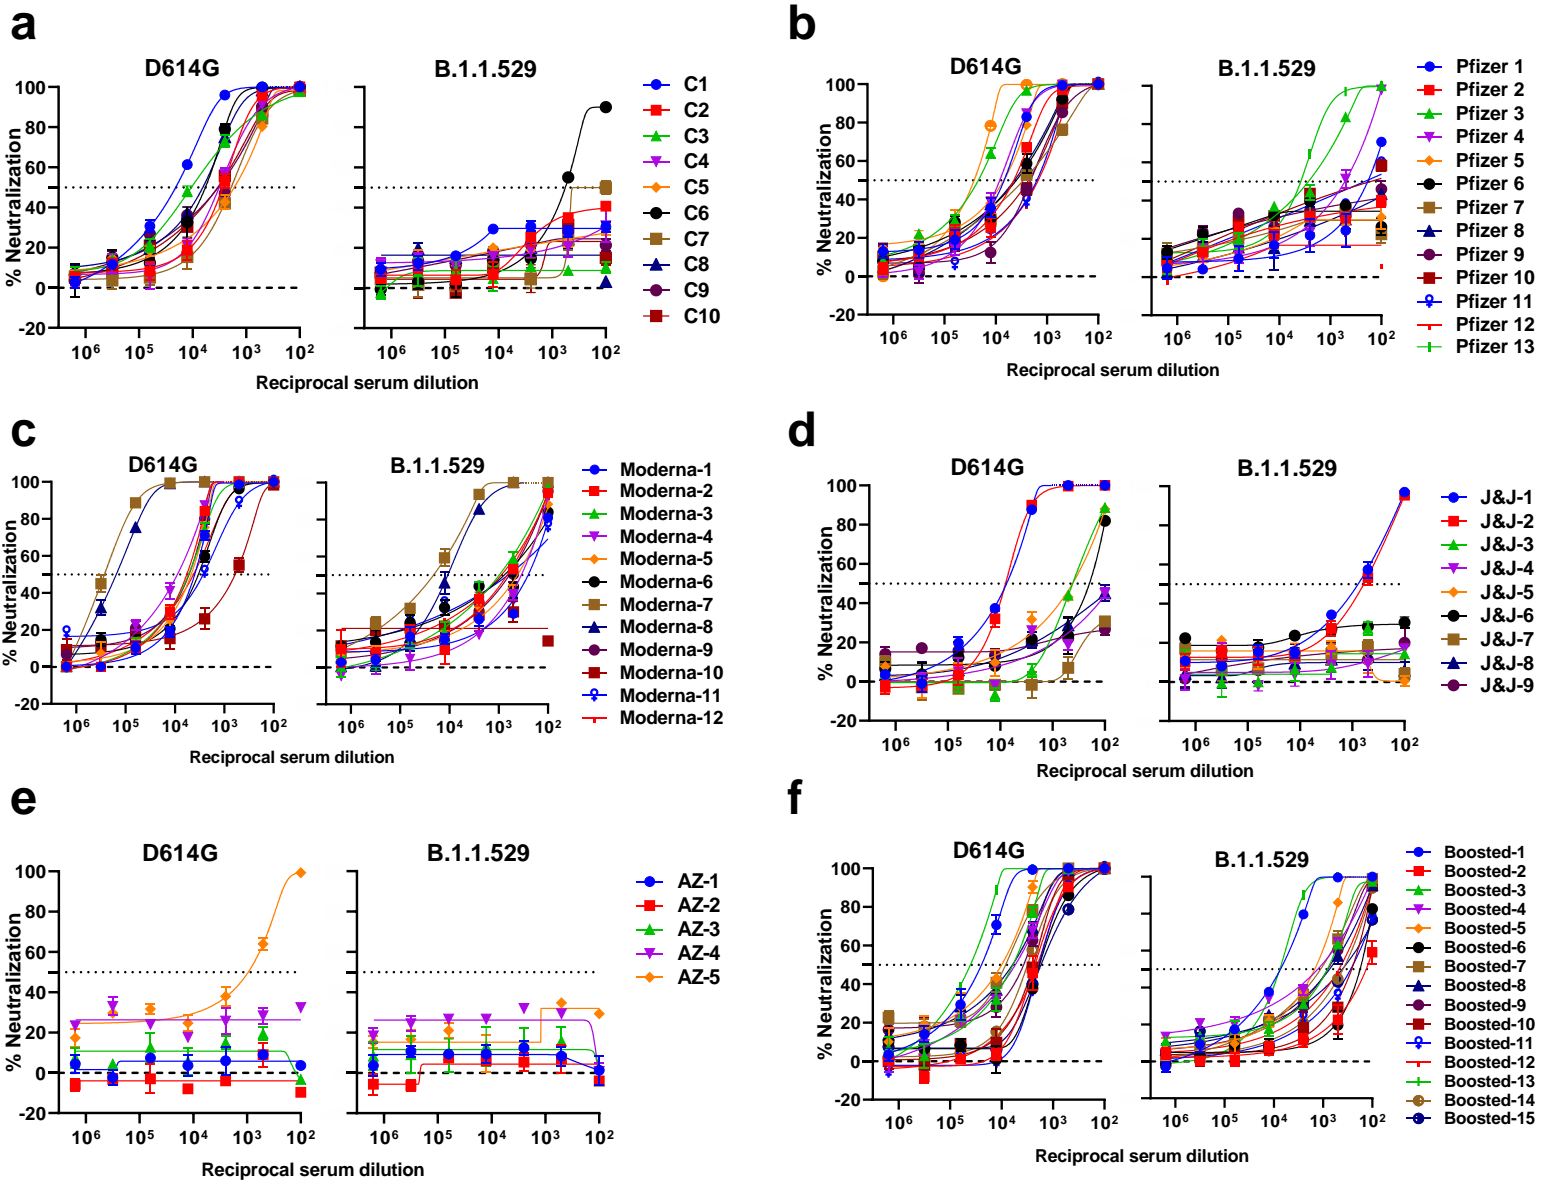

**Extended Data Fig. 2.** Individual neutralization curves for pseudovirus neutralization assays by serum. Neutralization by **a**, convalescent sera. **b**, Pfizer (BNT162b2) vaccinee sera. **c**, Moderna (mRNA-1273) vaccinee sera. **d**, J&J (Ad26.COVS) vaccinee sera. **e**, AstraZeneca (ChAdOx1 nCoV-19) vaccinee sera. **f**, boosted (three homologous BNT162b2 or mRNA-1273 vaccinations) vaccinee sera.

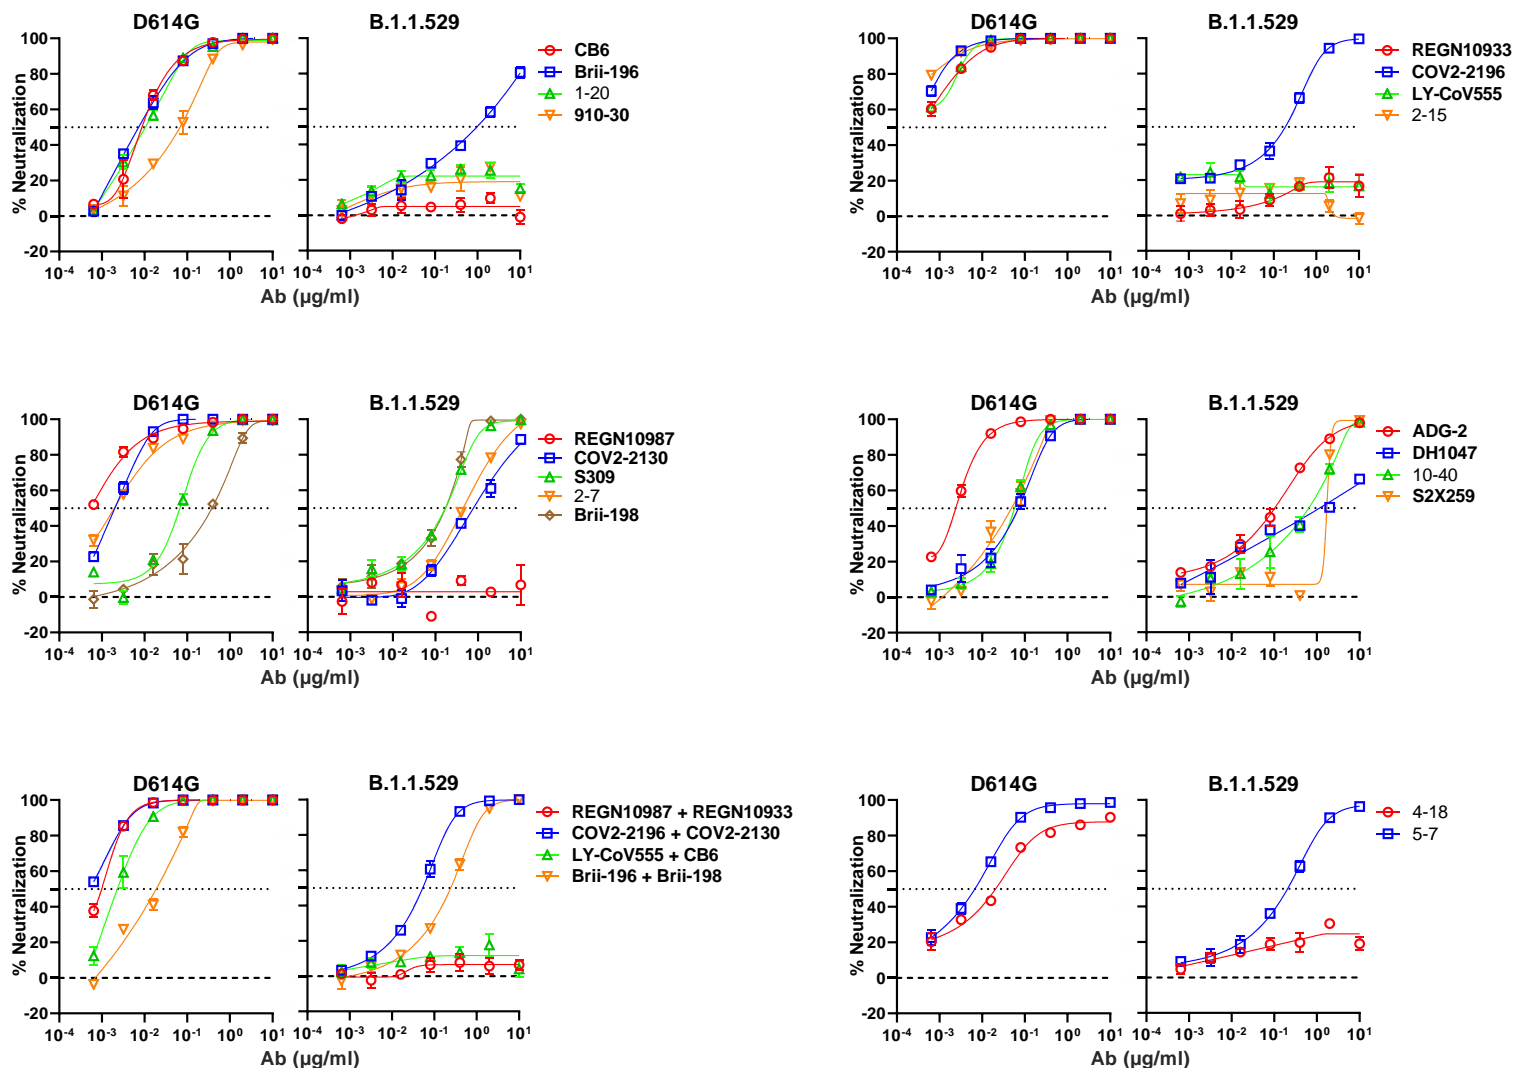

**Extended Data Fig. 3.** Individual neutralization curves for pseudovirus neutralization assays by monoclonal antibodies.

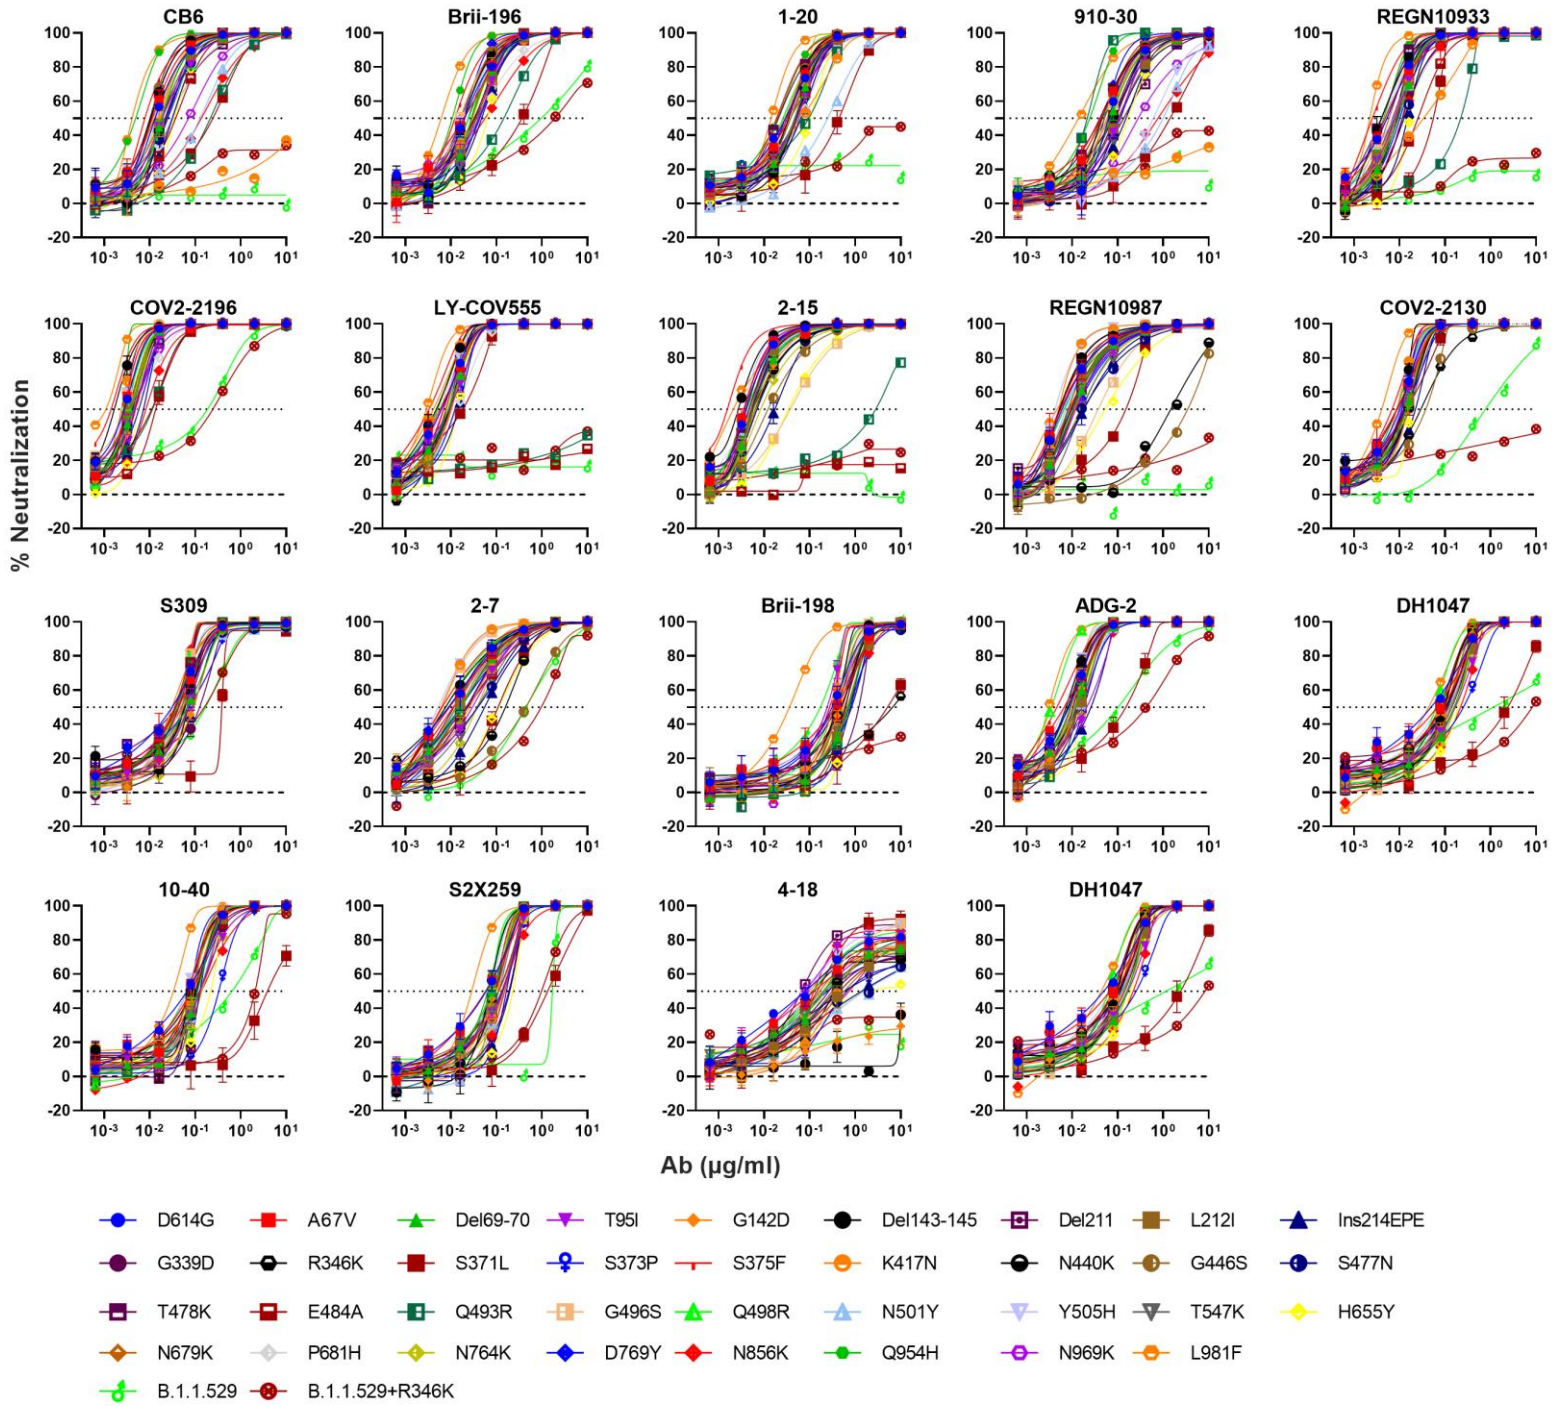

**Extended Data Fig. 4.** Individual neutralization curves for pseudovirus neutralization assays by monoclonal antibodies against individual SARS-CoV-2 mutations.

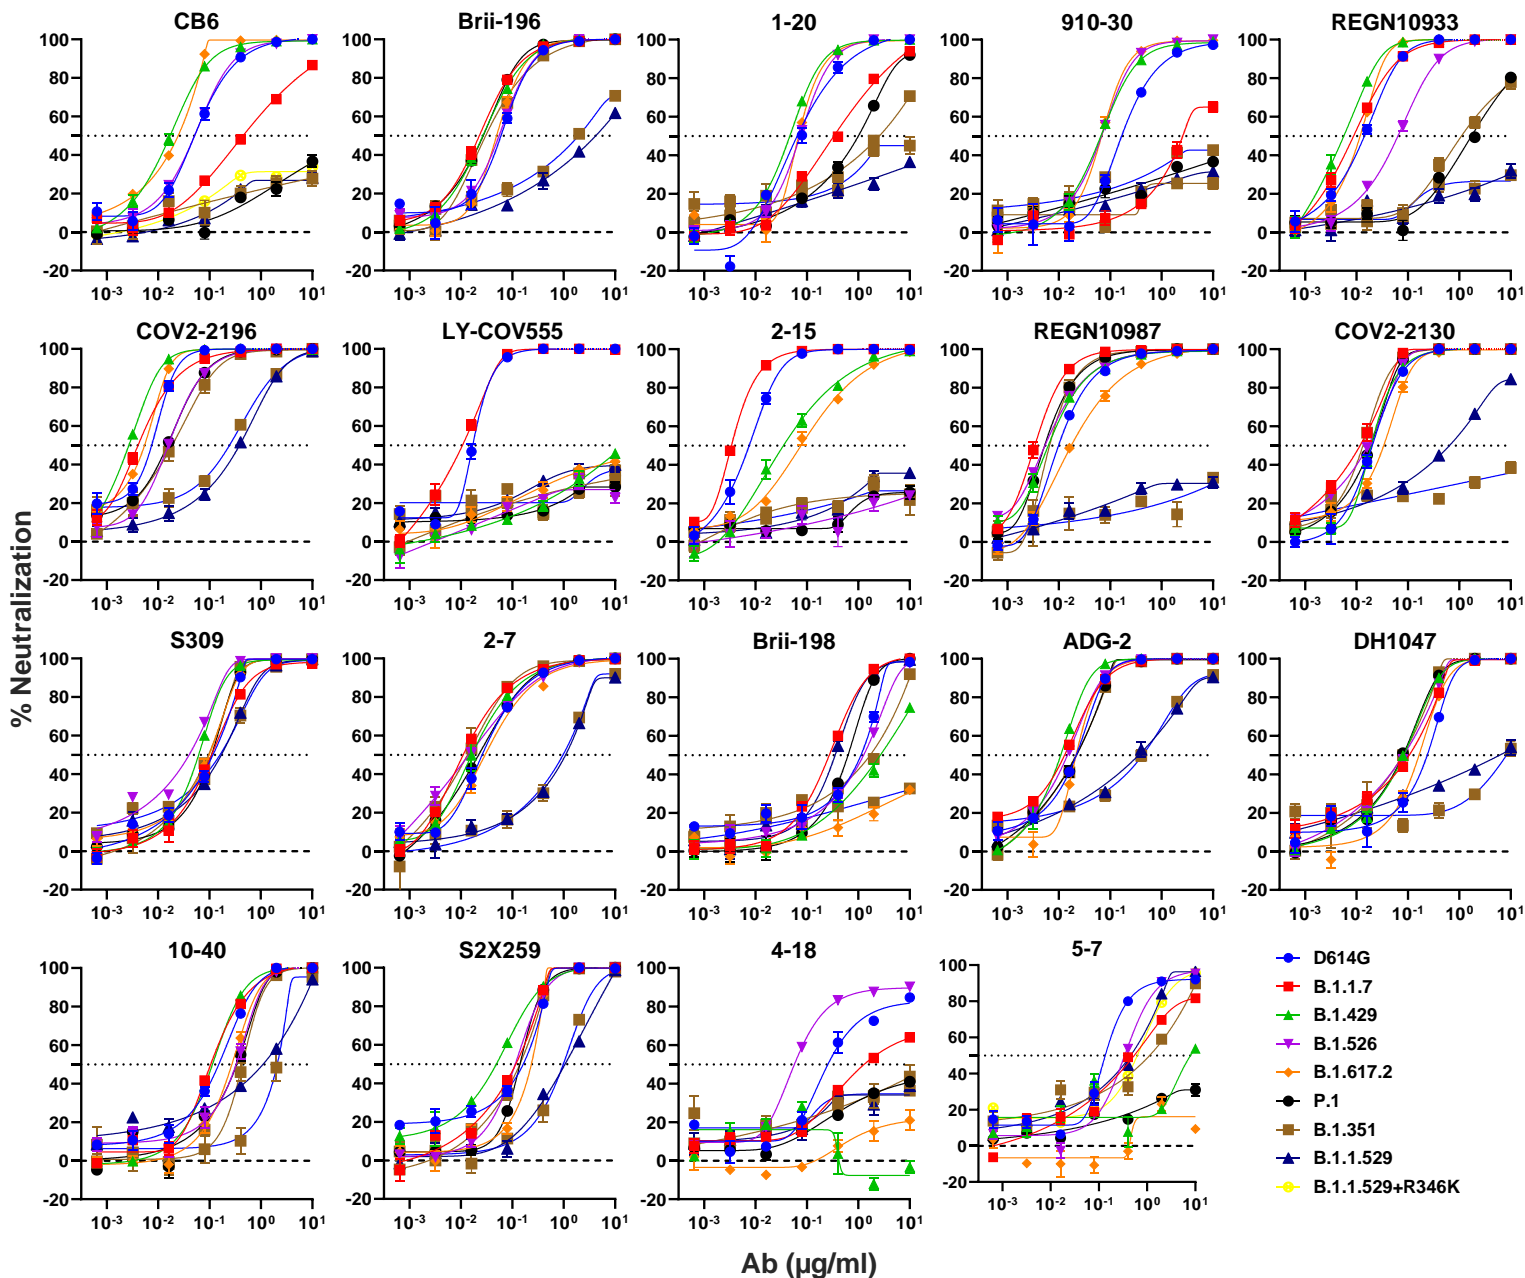

**Extended Data Fig. 5.** Individual neutralization curves for pseudovirus neutralization assays by monoclonal antibodies against SARS-CoV-2 variants.

**Extended Data Table 1.** Demographics and vaccination information for serum samples from convalescent patients used in this study.

| Convalescent Sample | Days post-symptoms | Age | Gender |
|---------------------|--------------------|-----|--------|
| C1                  | 18                 | 57  | Female |
| C2                  | 25                 | 51  | Male   |
| C3                  | 29                 | 71  | Female |
| C4                  | 32                 | 50  | Male   |
| C5                  | 35                 | 59  | Male   |
| C6                  | 120                | 56  | Male   |
| C7                  | 105                | 54  | Female |
| C8                  | 77                 | 51  | Female |
| C9                  | 18                 | 79  | Male   |
| C10                 | 9                  | 45  | Male   |

**Extended Data Table 2.** Demographics and vaccination information for serum samples from vaccinated individuals used in this study.

| Vaccine Sample                        | Vaccine type    | Days post-vaccination (after last dose) | Documented COVID Infection | Age | Gender |
|---------------------------------------|-----------------|-----------------------------------------|----------------------------|-----|--------|
| Moderna vaccinee #1                   | mRNA-1273       | 31                                      | No                         | 72  | Male   |
| Moderna vaccinee #2                   | mRNA-1273       | 19                                      | No                         | 38  | Female |
| Moderna vaccinee #3                   | mRNA-1273       | 6                                       | No                         | 42  | Male   |
| Moderna vaccinee #4                   | mRNA-1273       | 81                                      | No                         | 40  | Female |
| Moderna vaccinee #5                   | mRNA-1273       | 123                                     | No                         | 40  | Female |
| Moderna vaccinee #6                   | mRNA-1273       | 177                                     | No                         | 40  | Female |
| Moderna vaccinee #7                   | mRNA-1273       | 29                                      | No                         | 57  | Female |
| Moderna vaccinee #8                   | mRNA-1273       | 74                                      | No                         | 57  | Female |
| Moderna vaccinee #9                   | mRNA-1273       | 32                                      | No                         | 66  | Female |
| Moderna vaccinee #10                  | mRNA-1273       | 72                                      | No                         | 63  | Male   |
| Moderna vaccinee #11                  | mRNA-1273       | 74                                      | No                         | 68  | Female |
| Moderna vaccinee #12                  | mRNA-1273       | 58                                      | No                         | 46  | Female |
| Pfizer vaccinee #1                    | BNT162b2        | 21                                      | No                         | 62  | Male   |
| Pfizer vaccinee #2                    | BNT162b2        | 36                                      | No                         | 62  | Male   |
| Pfizer vaccinee #3                    | BNT162b2        | 26                                      | No                         | 38  | Male   |
| Pfizer vaccinee #4                    | BNT162b2        | 66                                      | No                         | 38  | Male   |
| Pfizer vaccinee #5                    | BNT162b2        | 22                                      | No                         | 57  | Female |
| Pfizer vaccinee #6                    | BNT162b2        | 61                                      | No                         | 57  | Female |
| Pfizer vaccinee #7                    | BNT162b2        | 20                                      | No                         | 55  | Male   |
| Pfizer vaccinee #8                    | BNT162b2        | 16                                      | No                         | 64  | Female |
| Pfizer vaccinee #9                    | BNT162b2        | 32                                      | No                         | 68  | Male   |
| Pfizer vaccinee #10                   | BNT162b2        | 20                                      | No                         | 35  | Male   |
| Pfizer vaccinee #11                   | BNT162b2        | 15                                      | No                         | 48  | Female |
| Pfizer vaccinee #12                   | BNT162b2        | 21                                      | No                         | 45  | Male   |
| Pfizer vaccinee #13                   | BNT162b2        | 213                                     | Yes                        | 66  | Male   |
| J&J vaccinee #1 (BEI Cat. #NRH-10818) | Ad26.COVS.2     | 55                                      | Yes                        | 50  | Female |
| J&J vaccinee #2 (BEI Cat. #NRH-10819) | Ad26.COVS.2     | 61                                      | Yes                        | 50  | Female |
| J&J vaccinee #3 (BEI Cat. #NRH-10835) | Ad26.COVS.2     | 186                                     | Unknown                    | 43  | Female |
| J&J vaccinee #4 (BEI Cat. #NRH-10845) | Ad26.COVS.2     | 69                                      | Unknown                    | 28  | Female |
| J&J vaccinee #5 (BEI Cat. #NRH-10823) | Ad26.COVS.2     | 50                                      | No                         | 42  | Female |
| J&J vaccinee #6 (BEI Cat. #NRH-10834) | Ad26.COVS.2     | 175                                     | Unknown                    | 43  | Female |
| J&J vaccinee #7 (BEI Cat. #NRH-10839) | Ad26.COVS.2     | 39                                      | No                         | 47  | Male   |
| J&J vaccinee #8 (BEI Cat. #NRH-10844) | Ad26.COVS.2     | 60                                      | Unknown                    | 28  | Female |
| J&J vaccinee #9 (BEI Cat. #NRH-10824) | Ad26.COVS.2     | 51                                      | No                         | 43  | Male   |
| AZ vaccinee #1 (BEI Cat. #NRH-10817)  | ChAdOx1 nCoV-19 | 158                                     | Unknown                    | 73  | Male   |
| AZ vaccinee #2 (BEI Cat. #NRH-10814)  | ChAdOx1 nCoV-19 | 152                                     | Unknown                    | 36  | Female |
| AZ vaccinee #3 (BEI Cat. #NRH-10815)  | ChAdOx1 nCoV-19 | 159                                     | Unknown                    | 36  | Female |
| AZ vaccinee #4 (BEI Cat. #NRH-10811)  | ChAdOx1 nCoV-19 | 142                                     | Yes                        | 26  | Female |
| AZ vaccinee #5 (BEI Cat. #NRH-3083)   | ChAdOx1 nCoV-19 | 91                                      | Unknown                    | 56  | Female |

**Extended Data Table 2 (continued).** Demographics and vaccination information for serum samples from vaccinated individuals used in this study.

| <b>Boosted Sample</b> | <b>Vaccine/boost type</b> | <b>Days post-boost (after last dose)</b> | <b>Documented COVID Infection</b> | <b>Age</b> | <b>Gender</b> |
|-----------------------|---------------------------|------------------------------------------|-----------------------------------|------------|---------------|
| Boosted sera #1       | mRNA-1273/mRNA-1273       | 28                                       | No                                | 66         | Female        |
| Boosted sera #2       | BNT162b2/BNT162b2         | 30                                       | No                                | 68         | Male          |
| Boosted sera #3       | BNT162b2/BNT162b2         | 14                                       | No                                | 64         | Female        |
| Boosted sera #4       | BNT162b2/BNT162b2         | 34                                       | No                                | 55         | Male          |
| Boosted sera #5       | BNT162b2/BNT162b2         | 34                                       | No                                | 45         | Male          |
| Boosted sera #6       | BNT162b2/BNT162b2         | 15                                       | No                                | 50         | Female        |
| Boosted sera #7       | BNT162b2/BNT162b2         | 15                                       | No                                | 48         | Female        |
| Boosted sera #8       | BNT162b2/BNT162b2         | 29                                       | No                                | 71         | Male          |
| Boosted sera #9       | BNT162b2/BNT162b2         | 90                                       | No                                | 59         | Male          |
| Boosted sera #10      | BNT162b2/BNT162b2         | 33                                       | No                                | 45         | Male          |
| Boosted sera #11      | BNT162b2/BNT162b2         | 87                                       | No                                | 66         | Female        |
| Boosted sera #12      | BNT162b2/BNT162b2         | 84                                       | No                                | 26         | Male          |
| Boosted sera #13      | mRNA-1273/mRNA-1273       | 23                                       | No                                | 28         | Female        |
| Boosted sera #14      | BNT162b2/BNT162b2         | 14                                       | No                                | 78         | Male          |
| Boosted sera #15      | BNT162b2/BNT162b2         | 14                                       | No                                | 75         | Female        |



**Extended Data Table 3.** Oligos used to construct spike expression plasmids.

| Oligo name         | Targeted mutations                | Oligo sequence                                                                          |
|--------------------|-----------------------------------|-----------------------------------------------------------------------------------------|
| O_single_mutant1   | A67V                              | ATGTGACCTGGTTCCATGTGATCCATGTGTCTGGCACCAATGGCACC                                         |
| O_single_mutant2   | Del69-70                          | CTGGTTCCATGCCATCTCTGGCACCAATGGCAC                                                       |
| O_single_mutant3   | T95I                              | CTTTGCCAGCATCGAGAAGAGCAACATCATC                                                         |
| O_single_mutant4   | Del143-145                        | TGTAATGACCCATTCTGGGACACAAGAACAACAAGTCTGGATG                                             |
| O_single_mutant5   | G142D                             | GTAATGACCCATTCTGGACGTCTACTACCACAAG                                                      |
| O_single_mutant6   | Del211                            | ACACACACCAATCCTGGTGAGGGACCTG                                                            |
| O_single_mutant7   | L212I                             | CACACCAATCAACATCGTGAGGGACCTGCC                                                          |
| O_single_mutant8   | Ins214EPE                         | ACCAATCAACCTGGTGAGGGAGCCCGAGGACCTGCCACAGGGCTT                                           |
| O_single_mutant9   | G339D                             | CTGTGTCCATTTGACGAGGTGTTCAATGCCAC                                                        |
| O_single_mutant10  | R346K                             | TGTTCAATGCCACCAAGTTTGCCTCTGTCTATGCCTG                                                   |
| O_single_mutant11  | S371F                             | CTCTGTGCTCTACAACCTTTCCTCCTTCAGCAC                                                       |
| O_single_mutant12  | S371L                             | CTCTGTGCTCTACAACCTGGCCTCCTTCAGCAC                                                       |
| O_single_mutant13  | S373P                             | CTCTACAACCTTGCCCCCTTCAGCACCTTCAAG                                                       |
| O_single_mutant14  | S375F                             | CAACTCTGCCTCCTTCTTCACCTTCAAGTGTATGG                                                     |
| O_single_mutant15  | K417N                             | CCCCTGGACAAACAGGCAACATTGCTGACTACAACCTACAACTGC                                           |
| O_single_mutant16  | N440K                             | CCTGGAACAGCAACAAGCTGGACAGCAAGGTG                                                        |
| O_single_mutant17  | G446S                             | GGACAGCAAGGTGAGCGGCAACTACAACACTAC                                                       |
| O_single_mutant18  | S477N                             | GATTTACCAGGCTGGCAACACACCATGTAATG                                                        |
| O_single_mutant19  | T478K                             | CAGCTGGCAGCAAGCCATGTAATGGAGTGGGA                                                        |
| O_single_mutant20  | E484A                             | GTAATGGAGTGGCCGGCTTCAACTGTTAC                                                           |
| O_single_mutant21  | Q493R                             | GTTACTTTCCACTCAGATCCTATGGCTTCCAAC                                                       |
| O_single_mutant22  | G496S                             | CACTCCAATCCTATAGCTTCCAACCAACCAATG                                                       |
| O_single_mutant23  | Q498R                             | CAATCCTATGGCTTCAGACCAACCAATGGAGTGGG                                                     |
| O_single_mutant24  | N501Y                             | CTTCCAACCAACCTACGGAGTGGGCTACCAACC                                                       |
| O_single_mutant25  | Y505H                             | AATGGAGTGGGCCACCAACCATACAGG                                                             |
| O_single_mutant26  | T547K                             | CTTCAATGGACTGAAGGGCACAGGAGTGCTGAC                                                       |
| O_single_mutant27  | H655Y                             | CTGATTGGAGCAGAGTACGTGAACAACCTCCTATG                                                     |
| O_single_mutant28  | N679K                             | CCAGACCCAGACCAAGAGCCCAAGGAGGGCA                                                         |
| O_single_mutant29  | P681H                             | CCCAGACCAACAGCAGAAGGAGGGCAAGGTCTGTGGC                                                   |
| O_single_mutant30  | N764K                             | GTACCCAACCTTAAGAGGGCTCTGACAGGC                                                          |
| O_single_mutant31  | D769Y                             | GACCTCCAATCAAGTACTTTGGAGGCTTC                                                           |
| O_single_mutant32  | N856K                             | GTGCCCAGAAGTTCAAGGGACTGACAGTGCTG                                                        |
| O_single_mutant33  | Q954H                             | CAAGATGTGGTGAACCACAATGCCAGGCTCTG                                                        |
| O_single_mutant34  | N969K                             | GCAACTTTCCAGCAAGTTTGGAGCCATCTCCTC                                                       |
| O_single_mutant35  | L981F                             | GTGCTGAATGACATCTTCAGCAGACTGGACAAGGTGGAGG                                                |
| O_multiple_oligo1  | A67V, Del69-70                    | TGGTTCCATGTGATCTCTGGCACCAATGG                                                           |
| O_multiple_oligo2  | T95I                              | CTTTGCCAGCATCGAGAAGAGCAAC                                                               |
| O_multiple_oligo3  | G142D, Del143-145                 | GACCCATTCTGGACCACAAGAACAACAAGTC                                                         |
| O_multiple_oligo4  | L212I, Ins214EPE                  | CACACACCAATCATCGTGAGGGAGCCCGAGGACCTGCCACAGGGCTTC                                        |
| O_multiple_oligo5  | G339D                             | TGTGTCCATTTGACGAGGTGTTCAATG                                                             |
| O_multiple_oligo6  | S371L, S373P, S375F               | TGTGCTCTACAACCTGGCCCCCTTCTTCACCTTCAAGTGTATG                                             |
| O_multiple_oligo7  | K417N                             | GGACAAACAGGCAACATTGCTGACTACA                                                            |
| O_multiple_oligo8  | N440K, G446S                      | GCAACAAGCTGGACAGCAAGGTGAGCGGCAACTACAA                                                   |
| O_multiple_oligo9  | S477N, T478K, E484A               | ACCAGGCTGGCAACAAGCCATGTAATGGAGTGGCCGGCTTCAACTGT                                         |
| O_multiple_oligo10 | Q493R, G496S, Q498R, N501Y, Y505H | TACTTTCCACTCAGATCCTATAGCTTTCAGACCAACCTACGGAGTGGGCCACCAACCATACAGG<br>GTGGTGGTGTCTGCTTTGA |
| O_multiple_oligo11 | T547K                             | GGACTGAAGGGCACAGGAG                                                                     |
| O_multiple_oligo12 | D614G                             | CTCTACCAGGGCGTGAACCTGTAC                                                                |
| O_multiple_oligo13 | H655Y                             | TTGGAGCAGAGTACGTGAACAACCTC                                                              |
| O_multiple_oligo14 | N679K, P681H                      | CAGACCAAGAGCCACAGGAGGGCAAGG                                                             |
| O_multiple_oligo15 | N764K                             | CCAACCTTAAGAGGGCTCTGACAG                                                                |
| O_multiple_oligo16 | D796Y                             | CCTCCAATCAAGTACTTTGGAGGCTTC                                                             |
| O_multiple_oligo17 | N856K                             | CAGAAGTTCAAGGGACTGACAGTGCTG                                                             |
| O_multiple_oligo18 | Q954H                             | GTGGTGAACCACAATGCCAGGCTC                                                                |
| O_multiple_oligo19 | N969K                             | AACCTTCCAGCAAGTTTGGAGCCATCTCCTC                                                         |
| O_multiple_oligo20 | L981F                             | AATGACATCTTCAGCAGACTGGACAAGGTGGAGGCTGAGGTCCAGATTG                                       |
